# Supplementary material for: Use of supramolecular chemistry based on β-cyclodextrin-grafted chitosan beads to prepare green biocatalytic materials
Source: Royal Society of Chemistry journal article supplement (doi:10.1039/d4ma00929k), 2024-12-02
Supplement: d4ma00929k1.pdf [file d4ma00929k1.pdf]

## Supplementary Information

# Use of supramolecular chemistry based on $\beta$ -cyclodextrin-grafted chitosan beads to prepare biocatalytic materials

Agatha Bastida, Leoncio Garrido and Alfonso Fernández-Mayoralas

**Figure S1.** IR spectra of chitosan (Ch) and  $\beta$ -cyclodextrin-grafted chitosan beads. A) Ch, B) Ch-HMDI-CD, C) Ch-XDI-CD, D) Ch-TDI-CD.

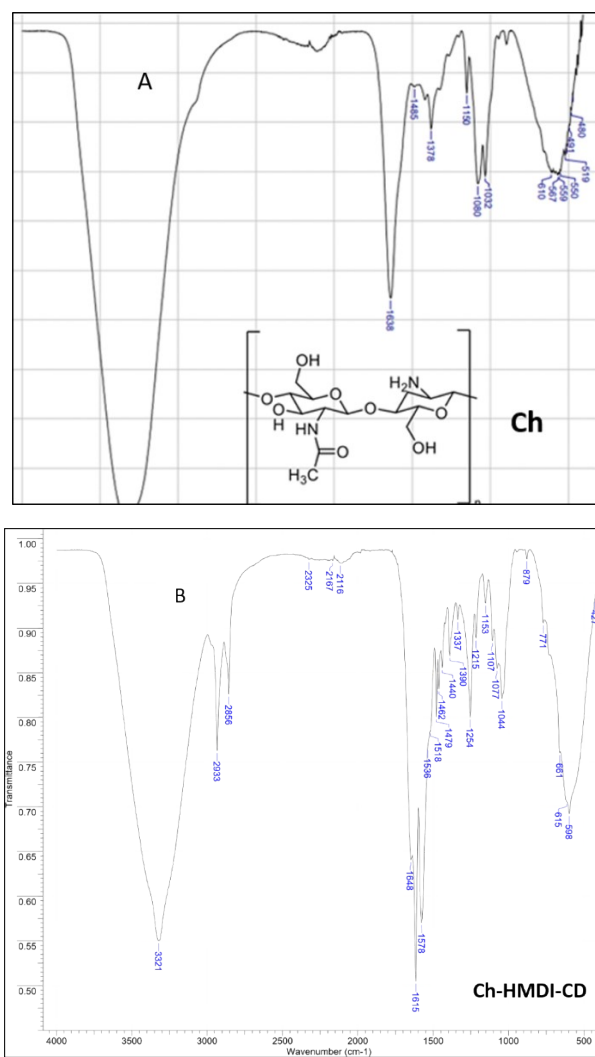

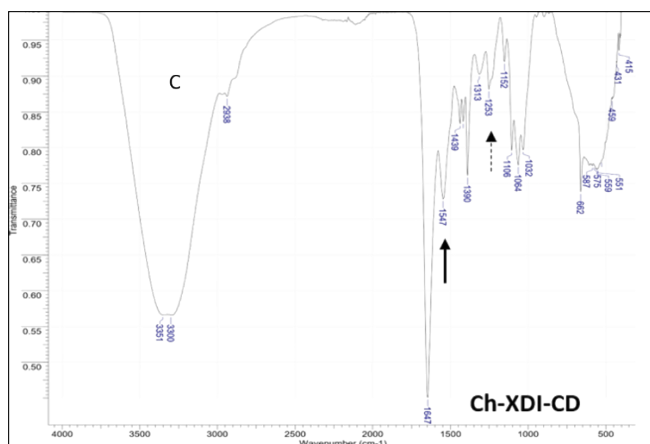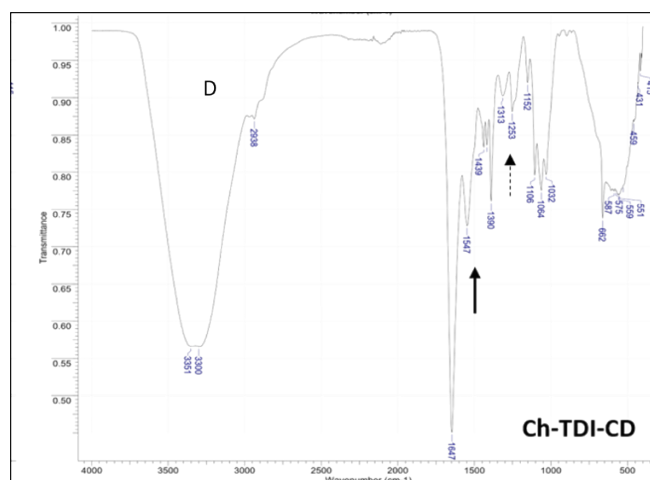

**Table S1.-** Activity of galactosidases, HRP and GOx before and after the introduction of adamantane (ada) group.

| Time (hours) | Activity (%)<br>$\beta$ -galactosidase<br><i>E. coli</i> | Activity (%)<br>$\beta$ -galactosidase from<br><i>B. bifidum</i> (Saphera) | Activity (%)<br>HRP | Activity (%)<br>GOx |
|--------------|----------------------------------------------------------|----------------------------------------------------------------------------|---------------------|---------------------|
| 0            | 100                                                      | 100                                                                        | 100                 | 100                 |
| 5            | 60                                                       | 55                                                                         | 80                  | 75                  |
| 24           | 42                                                       | 38                                                                         | 50                  | 40                  |

**Table S2.-** Reusability of the Ch-CD bead • ada- $\beta$ -Gal

| Residual activity of Ch-CD bead • ada- $\beta$ -Gal (%) |         |     |                                    |      |     |     |
|---------------------------------------------------------|---------|-----|------------------------------------|------|-----|-----|
| $\beta$ -Gal ( <i>E. coli</i> )                         |         |     | $\beta$ -Gal ( <i>B. bifidum</i> ) |      |     |     |
| Cycles                                                  | Linkers |     |                                    |      |     |     |
|                                                         | HMDI    | XDI | TDI                                | HMDI | XDI | TDI |
| 1                                                       | 100     | 100 | 100                                | 100  | 100 | 100 |
| 2                                                       | 86      | 86  | 100                                | 52   | 58  | 59  |
| 3                                                       | 67      | 67  | 81                                 | 25   | 23  | 24  |
| 4                                                       | 56      | 56  | 54                                 | 17   | 15  | 13  |
| 5                                                       | 40      | 40  | 45                                 | 12   | 11  | 17  |

**Table S3.-** Thermal stability of immobilized- $\beta$ -galactosidases at -4°C and 20°C.

| Time (day) | Residual activity (%)                                            |                                                                     |
|------------|------------------------------------------------------------------|---------------------------------------------------------------------|
|            | Ch-CD bead • ada- $\beta$ -Gal from <i>E coli</i> at -4°C (20°C) | Ch-CD bead • ada- $\beta$ -Gal from <i>B bifidum</i> at -4°C (20°C) |
| 0          | 100 (100)                                                        | 100 (100)                                                           |
| 1          | 100 (95)                                                         | 100 (92)                                                            |
| 3          | 100 (90)                                                         | 97 (90)                                                             |
| 5          | 100 (87)                                                         | 95 (85)                                                             |
| 10         | 99 (85)                                                          | 90 (82)                                                             |
| 14         | 99 (83)                                                          | 80 (80)                                                             |

**Table S4.** Reusability of the biocatalytic material.

| Cycles | TDI |
|--------|-----|
| 1      | 100 |
| 2      | 96  |
| 3      | 90  |
| 4      | 87  |
| 5      | 85  |
